# Supplementary material
Source: PubMed Central journal article supplement (PMC5443955)
Supplement: rspb20170515supp1.pdf [file rspb20170515supp1.pdf]

## Supplementary Figures and Tables

### Brent et al. Family network size and survival

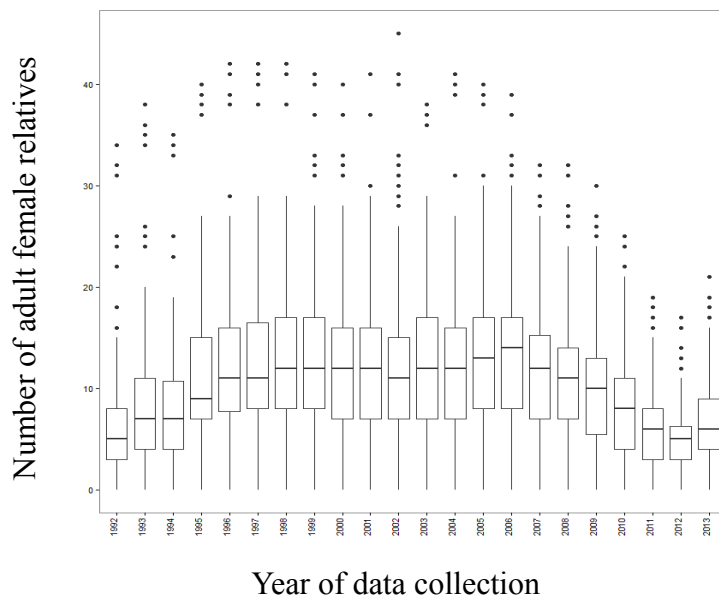

**Figure S1.** Number of close adult female relatives ( $r \geq 0.063$ ) recorded per year of data collection (1992-2013). Box plots show quartiles of distributions of data with the central line indicating the 50<sup>th</sup> percentile, and with outliers (e.g. values that are greater than the 75<sup>th</sup> percentile plus 1.5 times the inter-quartile range) shown as dots.

**Figure S2.** Number of close adult female relatives by age in years of subjects. Plots show increasingly restrictive grades of relatedness: (a)  $r \geq 0.063$ , (b)  $r \geq 0.125$ , (c)  $r \geq 0.25$ , (d)  $r \geq 0.5$ .

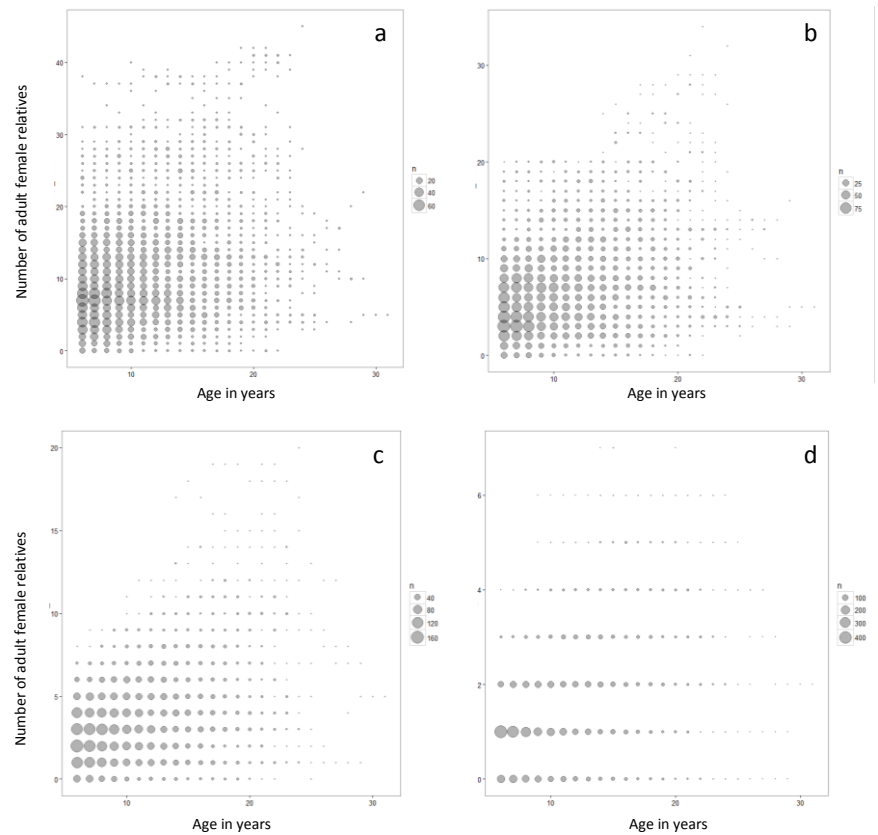

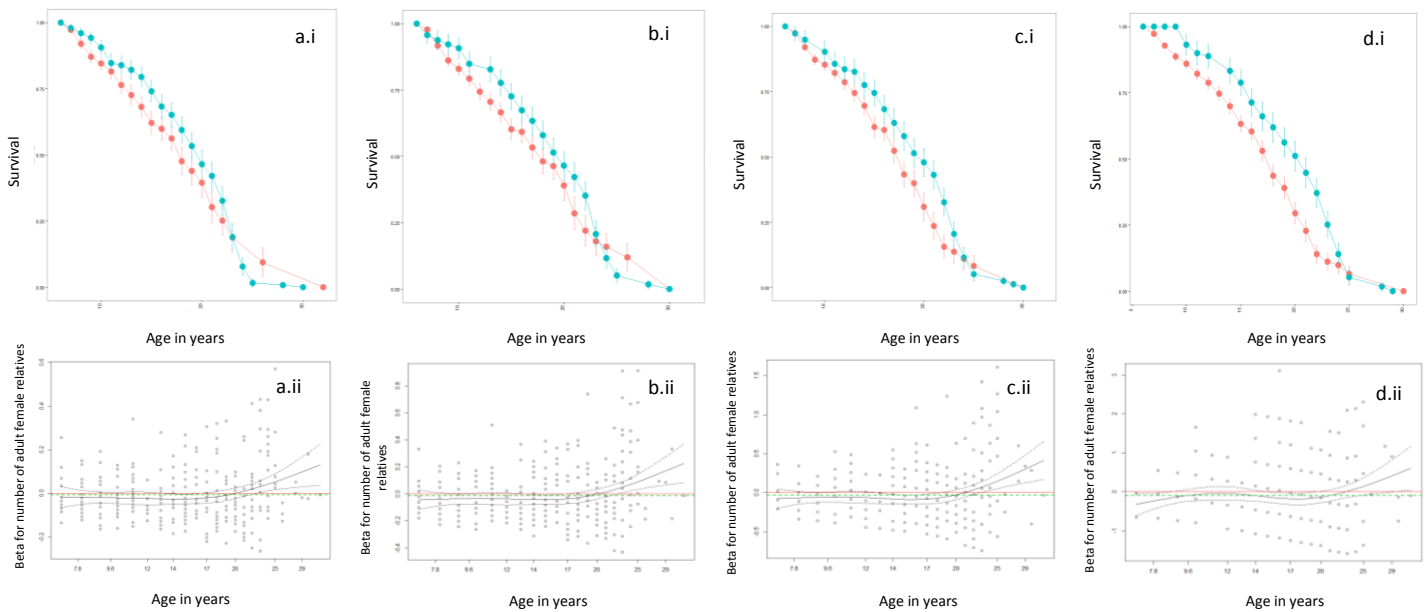

**Figure S3. Relationship between number of adult female relatives and survival.** Plots show increasingly restrictive grades of relatedness: (a)  $r \geq 0.063$ , (b)  $r \geq 0.125$ , (c)  $r \geq 0.25$ , (d)  $r = 0.5$ . (a.i-d.i) Relationship between survival and number of adult female relatives across female age generated using raw data, where the plots are Kaplan-Meier survival estimates with standard error bars. Blue lines are females with  $\geq 75\%$  quartile number of close adult female relatives, pink lines are females with  $< 25\%$  quartile number of close adult female relatives. The hazard coefficient for the impact of social support on survival (black line) was non-proportional, falling below zero (red line) in early years and above zero later in life in aii, bii and cii, apart from in d.ii ( $r = 0.5$ ) where the hazard coefficient did not change significantly with female age and where the main effect of family size on survival was significant (main text).

**Table S1. Results for models exploring the relationship between number of adult female relatives and survival.**

| Relatedness  | Model description                                                     |                                                                                      |                                                   |                                             |
|--------------|-----------------------------------------------------------------------|--------------------------------------------------------------------------------------|---------------------------------------------------|---------------------------------------------|
|              | Time-dependent covariate model<br>Main effect for number of relatives | Proportional Hazard model<br>significant p-value indicates a non-proportional hazard | Time-dependent coefficient model                  |                                             |
|              |                                                                       |                                                                                      | Survival for females aged 6-17                    | Survival for females aged 18+               |
| $\geq 0.063$ | Coeff = -0.01<br>exp = 0.993<br>p = 0.340                             | Rho = 0.142<br>p = <b>0.014</b>                                                      | Coeff = -0.023<br>exp = 0.977<br>p = <b>0.027</b> | Coeff = 0.010<br>exp = 1.010<br>p = 0.308   |
| $\geq 0.125$ | Coeff = -0.013<br>Exp = 0.987<br>p = 0.250                            | Rho = 0.159<br>p = <b>0.003</b>                                                      | Coeff = -0.0457<br>Exp = 0.9553<br>p = 0.073      | Coeff = 0.015<br>Exp = 1.015<br>p = 0.305   |
| $\geq 0.25$  | Coeff = -0.033<br>Exp = 0.968<br>p = 0.091                            | Rho = 0.139<br>p = <b>0.009</b>                                                      | Coeff = -0.093<br>Exp = 0.911<br>p = <b>0.003</b> | Coeff = 0.006<br>Exp = 1.001<br>p = 0.803   |
| $r = 0.5$    | Coeff = -0.105<br>Exp = 0.900<br>p = <b>0.019</b>                     | Rho = 0.0902<br>p = 0.109                                                            | Coeff = -0.140<br>Exp = 0.869<br>p = <b>0.026</b> | Coeff = -0.068<br>Exp = -0.068<br>p = 0.280 |

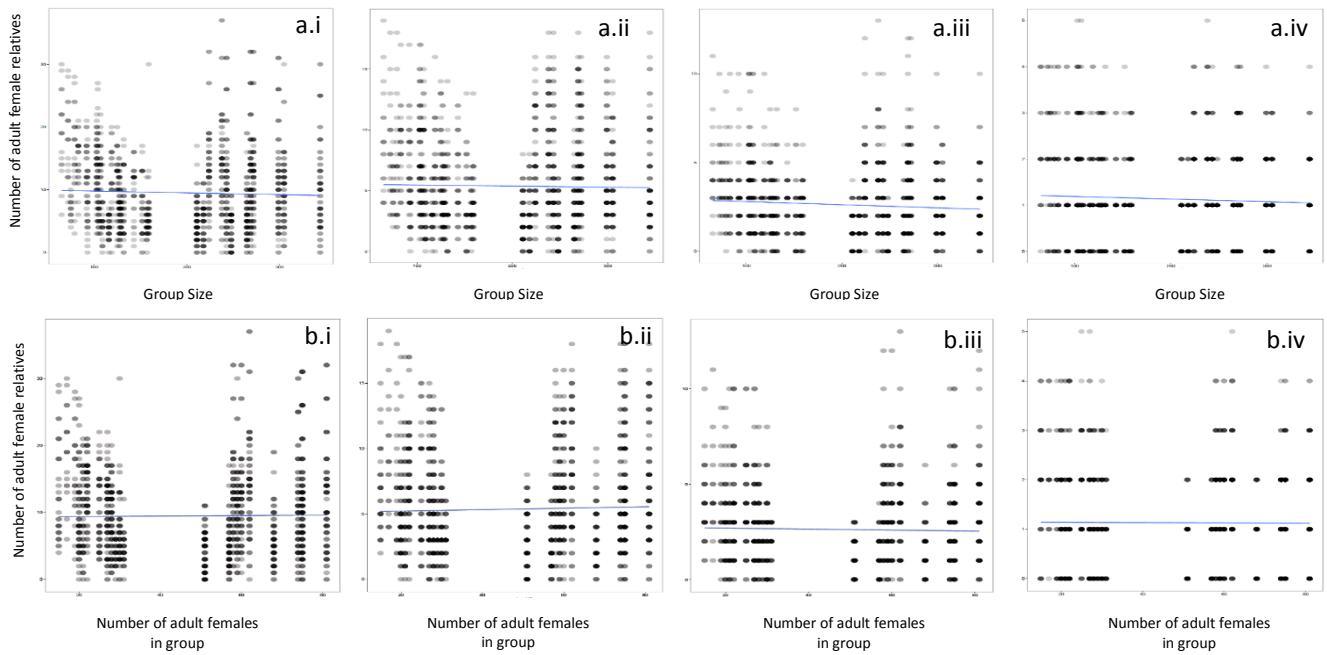

**Figure S4. Relationship between social support and group size.** (a) Females in larger groups do not have a greater number of close adult female relatives: (a.i)  $r \geq 0.063$ : estimate = 0.001,  $p = 0.376$ ; (a.ii)  $r \geq 0.125$ : estimate = 0.001,  $p = 0.471$ ; (a.iii)  $r \geq 0.25$ : estimate = 0.0001,  $p = 0.906$ ; (a.iv)  $r = 0.5$ : estimate = 0.0001,  $p = 0.246$ . (b) Females in groups with a greater number of adult females do have a greater number of close adult female relatives: (b.i)  $r \geq 0.063$ : estimate = 0.01,  $p < 0.001$ ; (b.ii)  $r \geq 0.125$ : estimate = 0.05,  $p < 0.001$ ; (b.iii)  $r \geq 0.25$ : estimate = 0.022,  $p < 0.001$ ; (b.iv)  $r = 0.5$ : estimate = 0.010,  $p < 0.001$ . Regardless, group size effects were not significant predictors of survival (main text).

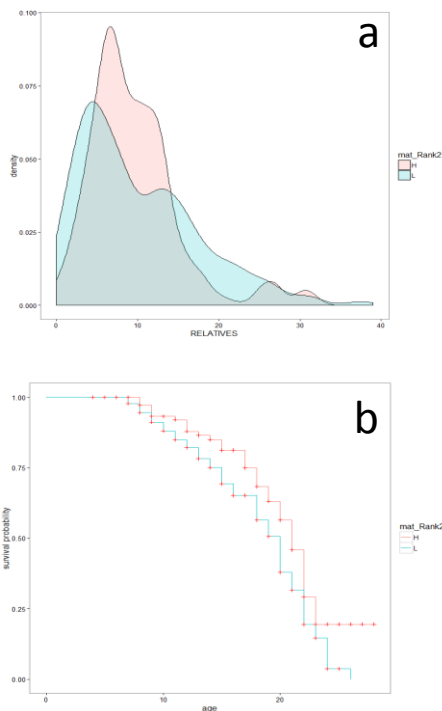

**Figure S5. Relationship between survival and maternal dominance rank.** (a) Females from higher ranking matriline (pink) did not have a greater number of close adult female relatives compared to females from lower ranking matriline (blue) (estimate = -0.325,  $p = 0.469$ ). (b) Females from lower ranking matriline (blue) had a lower survival probability compared to females from higher ranking matriline (red) (coefficient = 0.445,  $p = 0.043$ ). However, the inclusion of dominance rank did not qualitatively alter the relationship between social support and survival in prime-aged females (Table S2).

**Table S2. Results of the model exploring the relationship between number of adult female relatives and survival, controlling for matrilineal dominance rank**

| Relatedness  | Time-dependent coefficient model results, where the impact of female age is examined |                                                      |                                                   |
|--------------|--------------------------------------------------------------------------------------|------------------------------------------------------|---------------------------------------------------|
|              | Matrilineal rank                                                                     | Survival for females aged 6-17                       | Survival for females aged 18+                     |
| $\geq 0.063$ | Coeff = 0.454<br>Exp = 1.574<br><b>p = 0.040</b>                                     | Coeff = -0.074<br>Exp = 0.928<br><b>p &lt; 0.001</b> | Coeff = 0.017<br>Exp = 1.017<br>p = 0.449         |
| $\geq 0.125$ | Coeff = 0.354<br>Exp = 1.424<br>p = 0.110                                            | Coeff = -0.209<br>Exp = 0.811<br><b>p &lt; 0.001</b> | Coeff = 0.015<br>Exp = 1.015<br>p = 0.690         |
| $\geq 0.25$  | Coeff = 0.445<br>Exp = 1.560<br><b>p = 0.045</b>                                     | Coeff = -0.425<br>Exp = 0.653<br><b>p &lt; 0.001</b> | Coeff = -0.079<br>Exp = 0.924<br>p = 0.319        |
| r=0.5        | Coeff = 0.562<br>Exp = 1.754<br><b>p = 0.012</b>                                     | Coeff = -0.544<br>Exp = 0.580<br><b>p = 0.0002</b>   | Coeff = -0.398<br>Exp = 0.671<br><b>p = 0.040</b> |

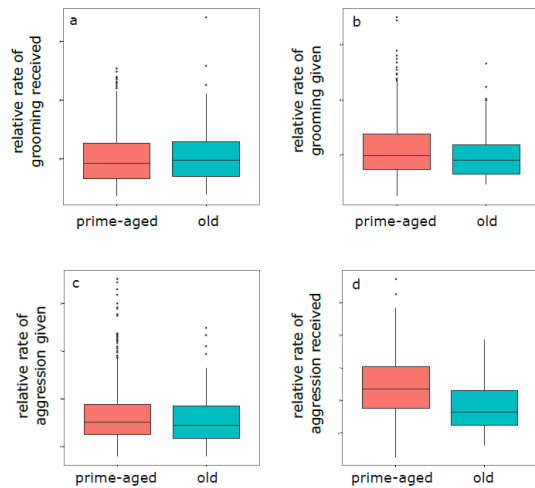

**Figure S6. Changes in behaviours with categories of female age.** Prime-aged and old females received (a) and gave (b) similar relative amounts of grooming, and gave similar relative amounts of aggression (c). In contrast, old adult females received significantly less aggression compared to prime-aged females (d). Statistical results are reported in the main text.
